# Supplementary material for: Synthesis and color tuning of boron diiminate conjugated polymers with aggregation-induced scintillation properties
Source: Royal Society of Chemistry journal article supplement (doi:10.1039/c5ra20459c), 2015-01-01
Supplement: c5ra20459c1.pdf [file c5ra20459c1.pdf]

## Supporting Information

### Synthesis and Color Tuning of Boron Diiminate Conjugated Polymers with Aggregation-Induced Scintillation Properties

Kazuo Tanaka\*<sup>1</sup>, Takayuki Yanagida<sup>2</sup>, Amane Hirose<sup>1</sup>, Honami Yamane<sup>1</sup>, Ryouusuke

Yoshii<sup>1</sup>, Yoshiki Chujo\*<sup>1</sup>

<sup>1</sup>*Department of Polymer Chemistry, Graduate School of Engineering, Kyoto University,*

*Katsura, Nishikyo-ku, Kyoto 615-8510, Japan*

<sup>2</sup>*Graduate School of Materials Science, Nara Institute of Science and Technology,*

*8916-5 Takayama-Cho, Ikoma, Nara 630-0192, Japan*

Y.C., [chujo@chujo.synchem.kyoto-u.ac.jp](mailto:chujo@chujo.synchem.kyoto-u.ac.jp)

K.T., [kazuo123@chujo.synchem.kyoto-u.ac.jp](mailto:kazuo123@chujo.synchem.kyoto-u.ac.jp)

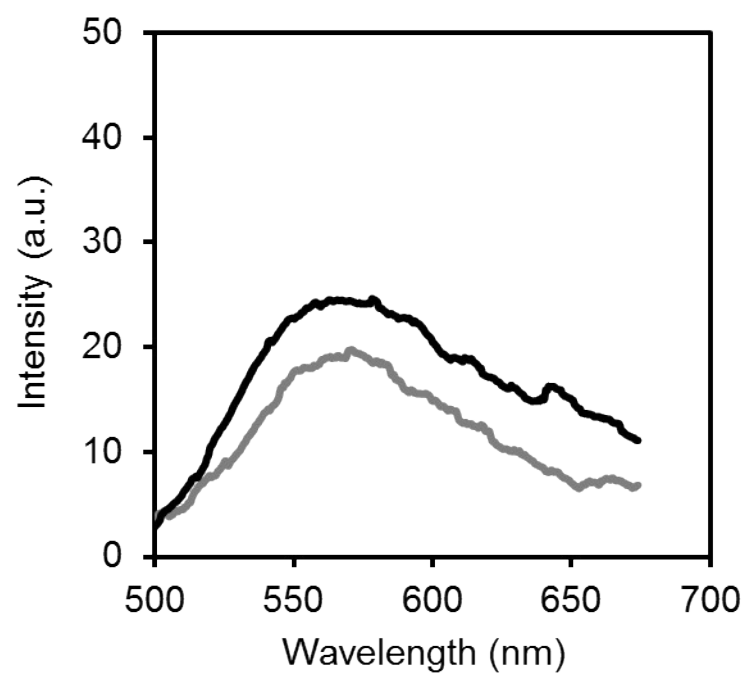

**Figure S1.** Radioluminescence spectra of the film samples of **P6** before (black line) and after (gray line) the X-ray irradiation (60 Gray).
